# Supplementary material
Source: Frontiers journal article supplement (https://www.frontiersin.org/articles/524330)
Supplement: Table_2.DOCX [file Table_2.DOCX]

**Supplementary material 2.** Fauna lists of caprine-bearing localities in this study. Some taxa shown here are modified from Bocherens et al. (2017) for Pha Bong and Tougard (1998, 2001) for Tham Wiman Nakin.

| **Locality** | **Pha Bong** | **Khok Sung** | **Tham Wiman Nakin** | **Tham Lod Rockshelter** | **Ban Rai Rockshelter** |
| --- | --- | --- | --- | --- | --- |
| **Approximate age (ka)** | **400 to 200 ka** | **217 or 130 ka** | **>169 ± 11 ka** | **32 to 11 ka** | **10 to 6 ka** |
| **Taxa** |  |  |  |  |  |
| PRIMATES |  |  |  |  |  |
| *Macaca* sp. |  | **+** |  |  | **+** |
| *Macaca nemestrina* |  |  | cf. |  |  |
| *Macaca arctoides* |  |  |  | **+** | **+** |
| *Macaca mulatta* |  |  |  | **+** | **+** |
| *Trachypithecus* sp. |  |  | **+** |  | **+** |
| *Hylobates* sp. |  |  |  |  | **+** |
| *Pongo* sp. | **+** |  |  |  |  |
| *Pongo pygmaeus* |  |  | **+** |  |  |
| *Gigantopithecus* sp. | **+** |  |  |  |  |
| *Homo* sp. |  |  | **+** |  |  |
| *Homo sapiens* |  |  |  | **+** | **+** |
|  |  |  |  |  |  |
| PHOLIDOTA |  |  |  |  |  |
| *Manis* sp. |  |  |  |  | **+** |
|  |  |  |  |  |  |
| RODENTIA |  |  |  |  |  |
| *Callosciurus finlaysonii* |  |  | **+** |  |  |
| *Menetes berdmorei* |  |  | **+** |  |  |
| *Petaurista petaurista* |  |  | **+** |  |  |
| *Hylopetes phayrei* |  |  | **+** |  |  |
| *Hylopetes spadiceus* |  |  | **+** |  |  |
| *Belomys pearsonii* |  |  | **+** |  |  |
| *Rhizomys* sp. | **+** |  |  | **+** | **+** |
| *Cannomys* sp. |  |  |  | **+** |  |
| *Vandeleuria oleracea* |  |  | **+** |  |  |
| *Hapalomys delacouri* |  |  | **+** |  |  |
| *Chiropodomys gliroides* |  |  | **+** |  |  |
| *Bandicota* sp. |  |  |  |  | **+** |
| *Bandicota indica* |  |  | **+** |  |  |
| *Hadromys humei* |  |  | **+** |  |  |
| *Mus shortridgei* |  |  | **+** |  |  |
| *Mus pahari* |  |  | **+** |  |  |
| *Mus cookii* |  |  | **+** |  |  |
| *Mus cervicolor* |  |  | **+** |  |  |
| *Berylmys berdmorei* |  |  | **+** |  |  |
| *Rattus andamanensis* |  |  | **+** |  |  |
| *Rattus rattus* |  |  | **+** |  |  |
| *Maxomys surifer* |  |  | **+** |  |  |
| *Niviventer fulvescens* |  |  | **+** |  |  |
| *Niviventer gracilis* |  |  | **+** |  |  |
| *Leopoldamys sabanus* |  |  | **+** |  |  |
| *Hystrix* sp. | **+** |  |  | **+** | **+** |
|  |  |  |  |  |  |
| CARNIVORA |  |  |  |  |  |
| *Cuon* sp. |  | **+** |  |  |  |
| *Canis* sp. |  |  |  |  | **+** |
| *Ursus* sp. | **+** |  |  |  |  |
| *Ursus thibetanus* |  |  | **+** | **+** | **+** |
| *Ailuropoda melanoleuca* | **+** |  | **+** |  |  |
| *Martes flavigula* |  |  | **+** |  |  |
| *Arctonyx collaris* |  |  | **+** | **+** | **+** |
| *Arctictis binturong* |  |  |  |  | **+** |
| *Panthera* sp. |  |  |  |  | **+** |
| *Panthera tigris* |  |  |  | **+** |  |
| *Paradoxurus hermaphroditus* |  |  | **+** |  |  |
| *Paguma larvata* |  |  | **+** |  |  |
| *Crocuta crocuta ultima* | **+** | **+** | **+** |  |  |
|  |  |  |  |  |  |
| PROBOSCIDEA |  |  |  |  |  |
| *Stegodon orientalis* |  | cf. |  |  |  |
| *Elaphas* sp. |  | **+** |  |  |  |
| *Elephas maximus* |  |  | cf. | **+** | **+** |
|  |  |  |  |  |  |
| PERISSODACTYLA |  |  |  |  |  |
| *Tapirus indicus* |  |  | **+** |  |  |
| *Rhinoceros* sp. | **+** |  |  | **+** | **+** |
| *Rhinoceros sondaicus* |  | **+** | **+** |  |  |
| *Rhinoceros unicornis* |  | **+** | **+** |  |  |
|  |  |  |  |  |  |
| ARTIODACTYLA |  |  |  |  |  |
| *Sus barbatus* |  | **+** | cf. |  |  |
| *Sus scrofa* | **+** |  | **+** | **+** | **+** |
| Cervidae indet. | **+** |  | **+** |  |  |
| *Rusa unicolor* |  | **+** | **+** | **+** | **+** |
| *Rucervus eldii* |  | **+** | **+** | **+** | **+** |
| *Axis porcinus* |  |  | **+** | **+** | **+** |
| *Axis axis* |  | **+** |  |  |  |
| *Muntiacus muntjak* |  |  | **+** | **+** | **+** |
| *Bos* sp. | **+** |  |  | **+** | **+** |
| *Bos sauveli* |  | **+** | **+** |  |  |
| *Bos javanicus* |  |  | **+** | **+** |  |
| *Bos gaurus* |  | **+** | **+** | **+** | **+** |
| *Bubalus arnee* |  | **+** | **+** | **+** | **+** |
| *Naemorhedus goral* | **+** |  | **+** | **+** |  |
| *Naemorhedus griseus* |  |  |  | **+** | **+** |
| *Capricornis sumatraensis* |  | **+** | **+** | **+** | **+** |

**References**

Bocherens, H., Schrenk, F., Chaimanee, Y., Kullmer, O., Mörike, D., Pushkina, D., et al. (2017). Flexibility of diet and habitat in Pleistocene South Asian mammals: Implications for the fate of the giant fossil ape *Gigantopithecus*. Quat. Int. 434, 148–155. doi: 10.1016/j.quaint.2015.11.059

Tougard, C. (1998). Les faunes de grands mammifères du Pléistocène moyen terminal de Thaïlande dans leur cadre phylogénétique, paléoécologique et biochronologique. [PhD. thesis]. [France (Montpellier)]: University of Montpellier II.

Tougard, C. (2001). Biogeography and migration routes of large mammal faunas in South–East Asia during the Late Middle Pleistocene: focus on the fossil and extant faunas from Thailand. Palaeogeogr. Palaeoclimatol. Palaeoecol. 168(3–4), 337–358. doi: 10.1016/S0031-0182(00)00243-1
